# Supplementary material for: Continuously Reinforced Carbon Nanotube Film Sea-Cucumber-like Polyaniline Nanocomposites for Flexible Self-Supporting Energy-Storage Electrode Materials
Source: MDPI journal article supplement (doi:10.3390/nano12010008), 2021-12-21
Supplement: s1 [file s1]

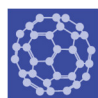

## Supplementary Material

# Continuously Reinforced Carbon Nanotube Film Sea-Cucumber-Like Polyaniline Nanocomposites for Flexible Self-Supporting Energy-Storage Electrode Materials

Bingjian Li <sup>1</sup>, Shi Liu <sup>1</sup>, Haicun Yang <sup>1</sup>, Xixi Xu <sup>1</sup>, Yinjie Zhou <sup>1</sup>, Rong Yang <sup>1,2</sup>, Yun Zhang <sup>3</sup> and Jinchun Li <sup>1,2,4,\*</sup>

<sup>1</sup> School of Materials Science and Engineering, Changzhou University, Changzhou 213164, China; lbj7151@163.com (B.L.); liushi19890101@126.com (S.L.); yhcobo@cczu.edu.cn (H.Y.); xxx970209@163.com (X.X.); zhouyinjie41@163.com (Y.Z.); cloudyyang@cczu.edu.cn (R.Y.)

<sup>2</sup> Jiangsu Key Laboratory of Environmentally Friendly Polymeric Materials, Changzhou University, Changzhou 213164, China

<sup>3</sup> Changzhou Key Laboratory of Functional Film Materials, Changzhou 213164, China; hannah0422@126.com

<sup>4</sup> National-Local Joint Engineering Research Center of Biomass Refining and High-Quality Utilization, Changzhou 213164, China

\* Correspondence: Lijinchun88@163.com

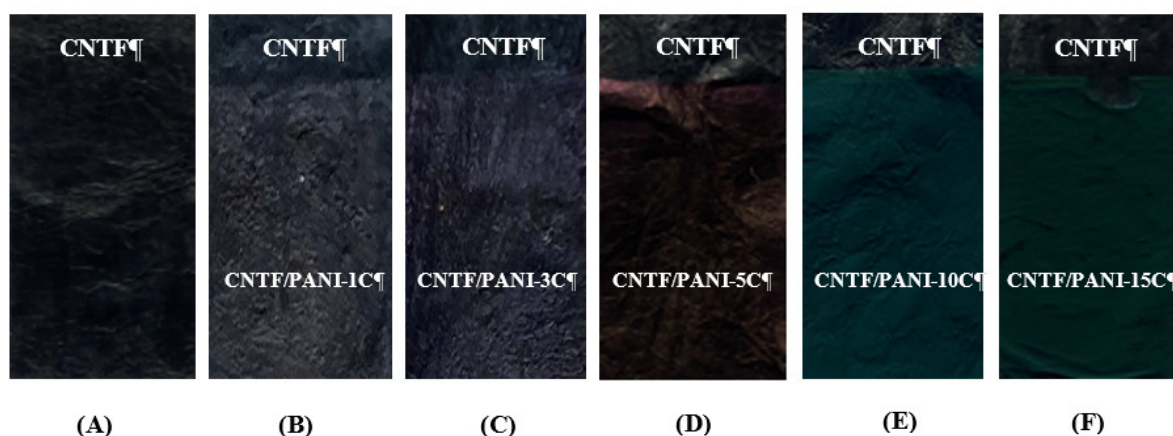

**Figure S1.** The colors of PANI layer changes during different electrochemical polymerization cycles. Acidified CNTF (A), CNTF/PANI-1C nanocomposites (B), CNTF/PANI-3C nanocomposites (C), CNTF/PANI-5C nanocomposites (D), CNTF/PANI-10C nanocomposites (E), and CNTF/PANI-15C nanocomposites (F).

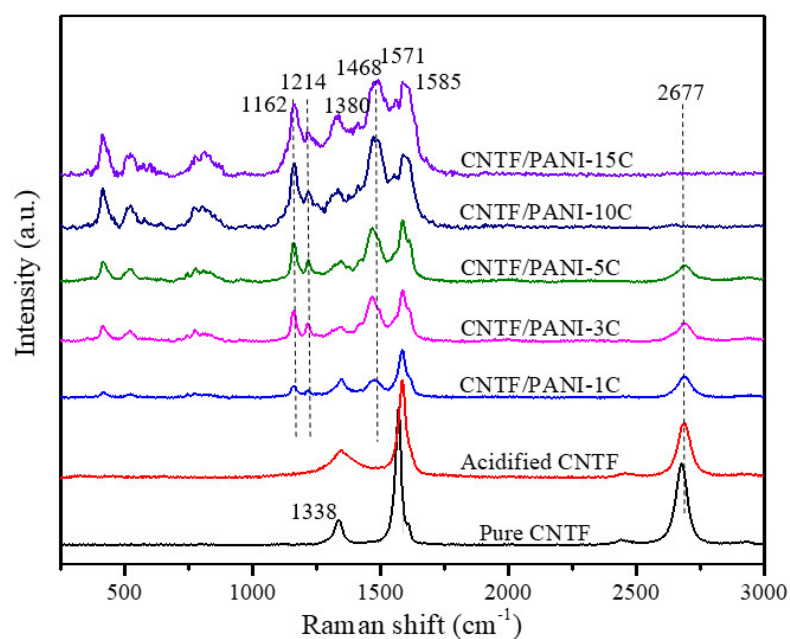

**Figure S2.** Raman spectra of pure CNTF, acidified CNTF, CNTF/PANI-1C nanocomposites, CNTF/PANI-3C nanocomposites, CNTF/PANI-5C nanocomposites, CNTF/PANI-10C nanocomposites and CNTF/PANI-15C nanocomposites.
